# Supplementary material for: Ovine Hair Follicle Stem Cells Derived from Single Vibrissae Reconstitute Haired Skin
Source: PubMed Central journal article supplement (PMC4581221; doi:10.3390/ijms160817779), 2015-08-03
Supplement: ijms-16-17779-s001.pdf [file ijms-16-17779-s001.pdf]

## Supplementary Information

**Table S1.** Primer sequences used for qRT-PCR.

| <b>Gene</b>  | <b>Primers</b>                                                  |
|--------------|-----------------------------------------------------------------|
| <i>Krt15</i> | Forward: GCAAGGTCCGCATCAAC<br>Reverse: AGAAACGAAGGACCCCTTG      |
| <i>Tp63</i>  | Forward: CTCCTCAGCACACGATTGA<br>Reverse: GCTGCTGAGGGTTGATAAGC   |
| <i>Krt14</i> | Forward: CACGAGGAGGAGATGAAAGC<br>Reverse: CTCCGTCTTGCTGAAGAACC  |
| <i>Itga6</i> | Forward: TAGTTGGTGAGCAAGCGATG<br>Reverse: CCATTTGCCGTTGCTAATTT  |
| <i>Krt19</i> | Forward: TGAGCGTGGAGACTGACATC<br>Reverse: TGATTTCCCTCCTCGTGGTTC |
| <i>Krt1</i>  | Forward: GCAACATGGAGACAGCTTGA<br>Reverse: TCCTTAATGGCGTTCTCACC  |
| <i>Krt27</i> | Forward: CCATCTAAAGCCACCGTG<br>Reverse: CACCCTCTGTTCACCTTCAT    |
| <i>Gapdh</i> | Forward: GTCCGTTGTGGATCTGACCT<br>Reverse: CGGGAGATTCTCAGTGTGGT  |

**Table S2.** Antibodies used for immunofluorescence staining.

| <b>Primary Antibody</b> | <b>Vendor and Catalog</b>     | <b>Dilution</b> |
|-------------------------|-------------------------------|-----------------|
| K15                     | Santa Cruz, sc-69554          | 1:100           |
| p63                     | Santa Cruz, sc-8431           | 1:100           |
| K14                     | Millipore, CBL197             | 1:100           |
| Integrin $\alpha 6$     | Biologend, 313602             | 1:100           |
| K19                     | Zhongshan Goldbridge, ZM-0074 | 1:100           |
| Ki67                    | eBioscience, 14-5698          | 1:200           |
| K16                     | ThermoFisher, MA5-13730       | 1:100           |

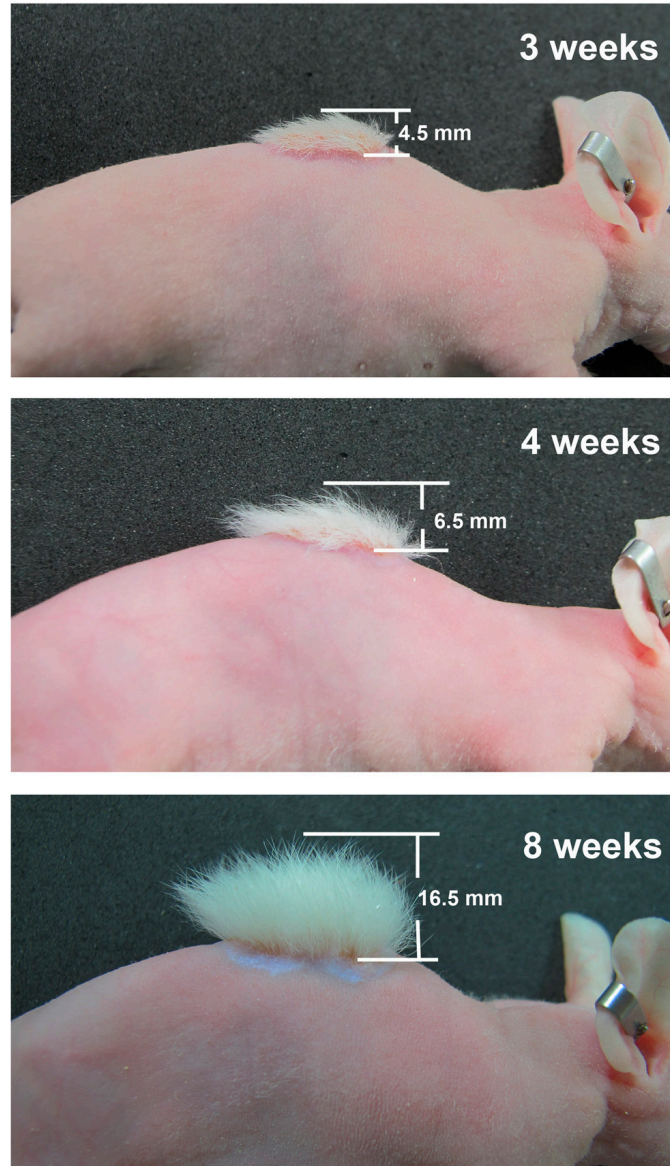

**Figure S1.** Hair growth of the hair follicles reconstituted by the ovine bulge-derived keratinocytes and neonatal rat dermal cells.

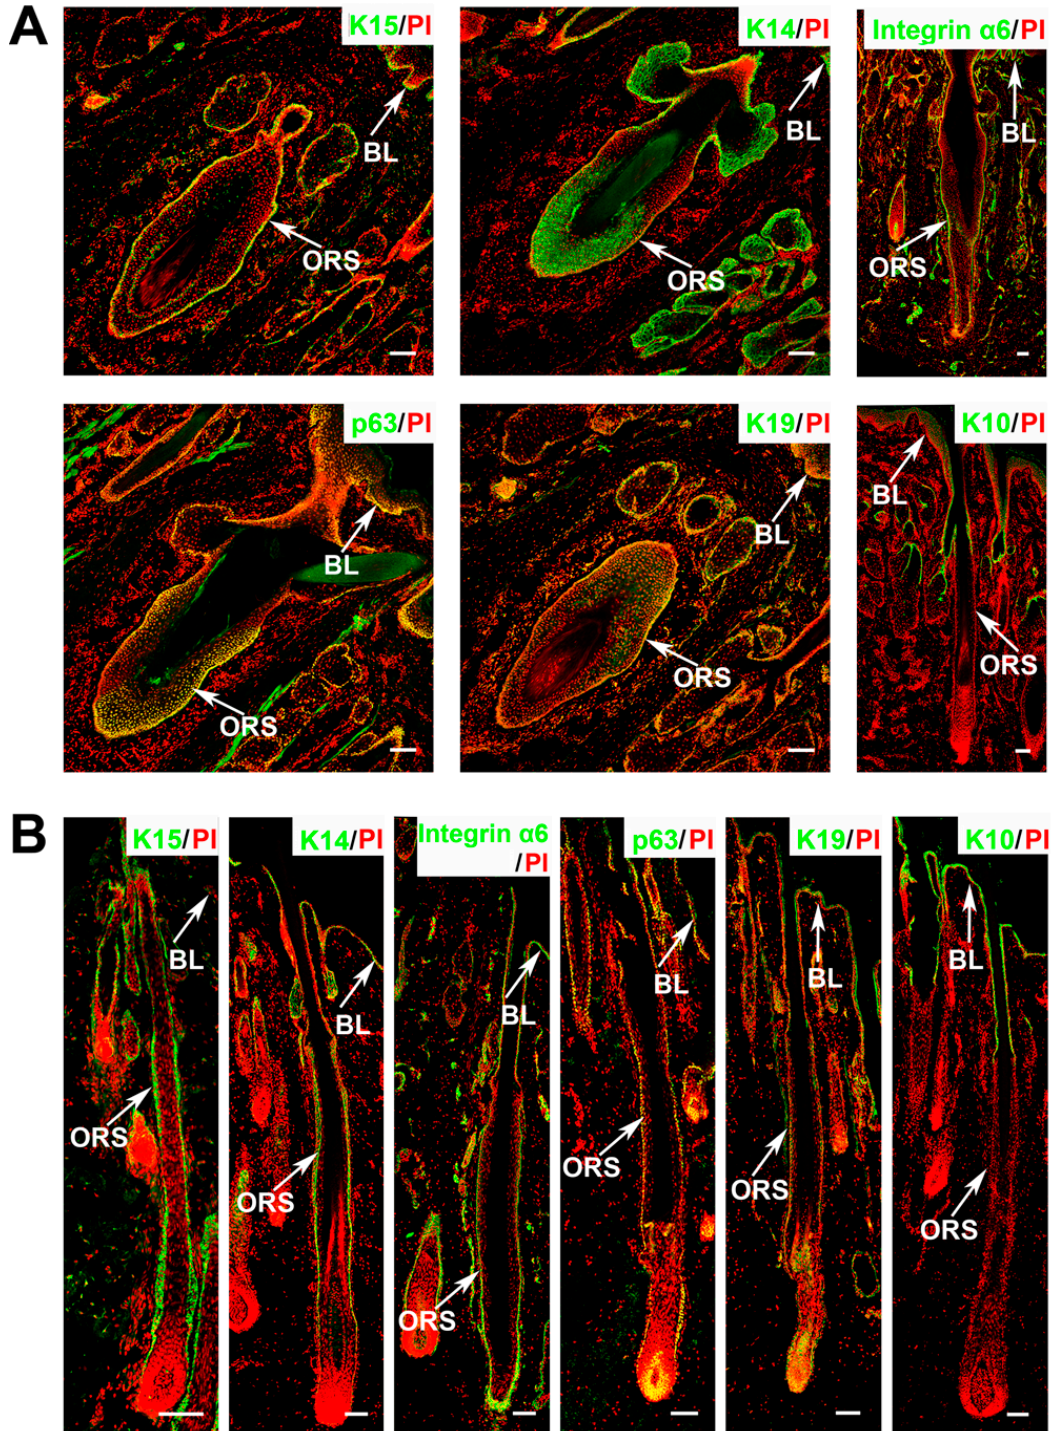

**Figure S2.** The expression of markers in ovine vibrissa skin and posterior neck skin. (A) Immunostaining of K15, K14, Integrin  $\alpha 6$ , p63, K19 and K10 in the ovine upper-lip skin including the vibrissa hair follicles; (B) Immunostaining of K15, K14, Integrin  $\alpha 6$ , p63, K19 and K10 in the ovine posterior neck skin. BL, basal layer; ORS, outer root sheath. Scale bar, 50  $\mu\text{m}$ .
